# Supplementary material
Source: publisher site journal article supplement (https://evolsyst.pensoft.net/article/59997/download/suppl/32/)
Supplement: Supplementary file 1

## Sheet: instructions
	INSTRUCTIONS and TERMS OF USE
	1	This is a morphometric template for species of the Tardigrada Order Echiniscoidea.
	2	The template caluclates the sc ratio and other relative measures only if all measurements required to calculate a ratio are provided (otherwise the ratio cell remains empty, meaning lack of data). The only numbers you need to enter are absolute measurements in micrometres [μm] in sheets "females", "males", "juveniles" and "larvae". If a structure is not measurable leave the cell empty (enetring z…
	3	Sheets "females", "males", "juveniles" and "larvae" automatically calculate basic statistics (number of measurements, range, mean and SD). The table with these statistics is placed after the last (30th) specimen. The summary table can be then copied and pasted directly to MS Word.
	4	If measurements are done on the type series, please enter the holotype in the first column (this way holotype data are automatically copied to the summary table at end of the sheet). If measurements are not done on the type series, you may delete the last two columns in the summary table. You may change specimen/slide names as desired.
	5	If a trait listed is not present in the species you are measuring, remove the entire row (highlight the row, right mouse click, choose "delete").
	6	Data from sheets "females", "males", "juveniles" and "larvae" are automatically copied to the four remaining "stats" sheets. Data in those sheets are arranged for statistical analyses in the majority of statistical software.
	7	If you want to see the formulas behind this template, press Ctrl+` (usually just before "1" on the keyboard). To return to the value view, press Ctrl+` again.
	8	This template can be freely used but each published use must be credited as Morphometric data were handled using the Echiniscoidea ver. 1.3 template available from the Tardigrada Register, www.tardigrada.net/register (Michalczyk & Kaczmarek 2013). The reference is: Michalczyk, Ł. & Kaczmarek, Ł. (2013) The Tardigrada Register: a comprehensive online data repository for tardigrade taxonomy. Journa…
	9	Copyright by Łukasz Michalczyk. Enquires and suggestions: LM@tardigrada.net

## Sheet: general info
	Species		Echiniscus tropicalis
	Population		ID.032
	Type series		NO
	Author		Piotr Gąsiorek
	Date		16.07.2020

## Sheet: females
SPECIMEN	1		2		3		4		5		6		7		8		9		10		11		12		13		14		15		16		17		18		19		20		21		22		23		24		25
CHARACTER	µm	sp	µm	sp	µm	sp	µm	sp	µm	sp	µm	sp	µm	sp	µm	sp	µm	sp	µm	sp	µm	sp	µm	sp	µm	sp	µm	sp	µm	sp	µm	sp	µm	sp	µm	sp	µm	sp	µm	sp	µm	sp	µm	sp	µm	sp	µm	sp	µm
Body length	188	490.862	178	508.571	178	482.385	173	494.286	221	492.205	223	512.644	209	509.756	191	479.899	137	383.754	164	488.095
Scapular plate length	38.3	–	35	–	36.9	–	35	–	44.9	–	43.5	–	41	–	39.8	–	35.7	–	33.6	–		–		–		–		–		–		–		–		–		–		–		–		–		–		–
Head appendages lengths
Cirrus internus	11.9	31.0705	10.1	28.8571	10.8	29.2683			14.1	31.4031	13.4	30.8046	13.2	32.1951	14.2	35.6784	10.2	28.5714	12.1	36.0119
Cephalic papilla	6.1	15.9269	6	17.1429	5.9	15.9892	6.5	18.5714	6.7	14.922	6.6	15.1724	7.7	18.7805	6	15.0754	5	14.0056	5.4	16.0714
Cirrus externus	14.2	37.0757	11.6	33.1429	13.4	36.3144	13.6	38.8571	16.7	37.1938	14.4	33.1034	14.9	36.3415	15	37.6884	13	36.4146	12.1	36.0119
Clava	4.3	11.2272	4.5	12.8571	5.1	13.8211	4.9	14	5.8	12.9176	6.1	14.023	5.9	14.3902	4.9	12.3116			4.4	13.0952
Cirrus A	23.7	61.8799	23.9	68.2857	27.4	74.2547	24.4	69.7143	30.7	68.3742	29.4	67.5862	32.5	79.2683			24.1	67.507	25.6	76.1905
Cirrus A/Body length ratio	0.126064	–	0.13427	–	0.153933	–	0.14104	–	0.138914	–	0.131839	–	0.155502	–		–	0.175912	–	0.156098	–		–		–		–		–		–		–		–		–		–		–		–		–		–		–
Body appendages lengths
Cirrus B	8.9	23.2376	7.4	21.1429	6.4	17.3442	5.7	16.2857	10.3	22.9399	6.6	15.1724	6.8	16.5854	9	22.6131			8.3	24.7024
Cirrus C	12.3	32.1149	9.3	26.5714	9.8	26.5583	10	28.5714	14.7	32.7394	11.7	26.8966	10.7	26.0976	10	25.1256	9.8	27.451	9	26.7857
Cirrus Cd	6.2	16.188	5.8	16.5714	6.7	18.1572	6.1	17.4286	6.7	14.922	6.3	14.4828	5.5	13.4146	5.9	14.8241	6.5	18.2073	7	20.8333
Cirrus D	10.3	26.893	9.7	27.7143	5.7	15.4472	7.5	21.4286	10.2	22.7171	10.8	24.8276	7.6	18.5366	8.5	21.3568			8.7	25.8929
Cirrus Dd	11.3	29.5039	9.2	26.2857	9.5	25.7453	9.3	26.5714	11	24.4989	11.5	26.4368	8.6	20.9756	10.7	26.8844	8.5	23.8095	9.4	27.9762
Cirrus E	11	28.7206	9.3	26.5714	11.9	32.2493	9.7	27.7143	13.5	30.0668	12.6	28.9655	10.9	26.5854	13	32.6633	11	30.8123	12.6	37.5
Spine on leg I length	2.7	7.04961	2.2	6.28571	2.7	7.31707	2.4	6.85714	3.6	8.01782	3.7	8.50575	2.8	6.82927	3.5	8.79397	1.9	5.32213	2.5	7.44048
Papilla on leg IV length	3	7.8329	3.2	9.14286	3.2	8.67209	3.8	10.8571	4.3	9.57684	3.9	8.96552	3.8	9.26829	3.7	9.29648	3.2	8.96359	3.2	9.52381
Number of teeth on the collar	12	–	12	–	12	–	11	–	14	–	12	–	8	–	11	–	10	–	15	–		–		–		–		–		–		–		–		–		–		–		–		–		–		–
Claw 1 heights
Branch	10.7	27.9373	10	28.5714	9.6	26.0163	9.6	27.4286	12.4	27.6169	12.3	28.2759	11.3	27.561	11.2	28.1407	10.3	28.8515	10.2	30.3571
Spur	1.9	4.96084	1.5	4.28571			1.5	4.28571	2.6	5.79065	2.1	4.82759	1.9	4.63415	2.4	6.03015	2	5.60224
Spur/branch height ratio	0.17757	–	0.15	–		–	0.15625	–	0.209677	–	0.170732	–	0.168142	–	0.214286	–	0.194175	–		–		–		–		–		–		–		–		–		–		–		–		–		–		–		–
Claw 2 heights
Branch	10.6	27.6762	9.6	27.4286	9.9	26.8293	9.2	26.2857	12	26.7261	11	25.2874	10.3	25.122	11	27.6382	9.2	25.7703	9.6	28.5714
Spur	2	5.22193	1.6	4.57143	2	5.42005	1.7	4.85714	2	4.45434	2	4.5977	1.6	3.90244	1.9	4.77387	1.9	5.32213	1.6	4.7619
Spur/branch height ratio	0.188679	–	0.166667	–	0.20202	–	0.184783	–	0.166667	–	0.181818	–	0.15534	–	0.172727	–	0.206522	–	0.166667	–		–		–		–		–		–		–		–		–		–		–		–		–		–		–
Claw 3 heights
Branch	10.5	27.4151	9.4	26.8571	9.7	26.2873	8.7	24.8571	12.3	27.3942	11.2	25.7471	9.5	23.1707	11.1	27.8894	9	25.2101	9.6	28.5714
Spur			1.8	5.14286	1.7	4.60705	1.8	5.14286	2.3	5.12249	2	4.5977	1.9	4.63415	2	5.02513	1.6	4.48179	1.9	5.65476
Spur/branch height ratio		–	0.191489	–	0.175258	–	0.206897	–	0.186992	–	0.178571	–	0.2	–	0.18018	–	0.177778	–	0.197917	–		–		–		–		–		–		–		–		–		–		–		–		–		–		–
Claw 4 heights
Branch	12.9	33.6815	11.2	32	11.1	30.0813	10.7	30.5714	14.5	32.294	13.3	30.5747	13	31.7073	13.9	34.9246	11.3	31.6527	11.2	33.3333
Spur			2.2	6.28571			2.1	6			2.5	5.74713	2.3	5.60976			2.5	7.0028	2	5.95238
Spur/branch height ratio		–	0.196429	–		–	0.196262	–		–	0.18797	–	0.176923	–		–	0.221239	–	0.178571	–		–		–		–		–		–		–		–		–		–		–		–		–		–		–
[truncated: 17 more columns]

## Sheet: males
SPECIMEN	1 (HOL)		2		3		4		5		6		7		8		9		10		11		12		13		14		15		16		17		18		19		20		21		22		23		24		25
CHARACTER	µm	sc	µm	sc	µm	sc	µm	sc	µm	sc	µm	sc	µm	sc	µm	sc	µm	sc	µm	sc	µm	sc	µm	sc	µm	sc	µm	sc	µm	sc	µm	sc	µm	sc	µm	sc	µm	sc	µm	sc	µm	sc	µm	sc	µm	sc	µm	sc	µm
Body length
Scapular plate length		–		–		–		–		–		–		–		–		–		–		–		–		–		–		–		–		–		–		–		–		–		–		–		–
Head appendages lengths
Cirrus internus
Cephalic papilla
Cirrus externus
Clava
Cirrus A
Cirrus A/Body length ratio		–		–		–		–		–		–		–		–		–		–		–		–		–		–		–		–		–		–		–		–		–		–		–		–
Cirrus int/ext length ratio		–		–		–		–		–		–		–		–		–		–		–		–		–		–		–		–		–		–		–		–		–		–		–		–
Body appendages lengths
Cirrus B
Cirrus Bl
Cirrus Bd
Cirrus C
Cirrus Cl
Cirrus Cd
Cirrus D
Cirrus Dl
Cirrus Dd
Cirrus E
Cirrus El
Cirrus Ed
Spine on leg I length
Spine on leg II length
Spine on leg III length
Papilla on leg IV length
Number of teeth on the collar		–		–		–		–		–		–		–		–		–		–		–		–		–		–		–		–		–		–		–		–		–		–		–		–
Notch length
Claw 1 heights
Branch
Spur
Spur/branch height ratio		–		–		–		–		–		–		–		–		–		–		–		–		–		–		–		–		–		–		–		–		–		–		–		–
Claw 2 heights
Branch
Spur
Spur/branch height ratio		–		–		–		–		–		–		–		–		–		–		–		–		–		–		–		–		–		–		–		–		–		–		–		–
Claw 3 heights
Branch
Spur
Spur/branch height ratio		–		–		–		–		–		–		–		–		–		–		–		–		–		–		–		–		–		–		–		–		–		–		–		–
Claw 4 heights
Branch
Spur
Spur/branch height ratio		–		–		–		–		–		–		–		–		–		–		–		–		–		–		–		–		–		–		–		–		–		–		–		–
Third median plate (0 = absent; 1 = present)
[truncated: 19 more columns]

## Sheet: juveniles
SPECIMEN	1 (HOL)		2		3		4		5		6		7		8		9		10		11		12		13		14		15		16		17		18		19		20		21		22		23		24		25
CHARACTER	µm	sc	µm	sc	µm	sc	µm	sc	µm	sc	µm	sc	µm	sc	µm	sc	µm	sc	µm	sc	µm	sc	µm	sc	µm	sc	µm	sc	µm	sc	µm	sc	µm	sc	µm	sc	µm	sc	µm	sc	µm	sc	µm	sc	µm	sc	µm	sc	µm
Body length
Scapular plate length		–		–		–		–		–		–		–		–		–		–		–		–		–		–		–		–		–		–		–		–		–		–		–		–
Head appendages lengths
Cirrus internus
Cephalic papilla
Cirrus externus
Clava
Cirrus A
Cirrus A/Body length ratio		–		–		–		–		–		–		–		–		–		–		–		–		–		–		–		–		–		–		–		–		–		–		–		–
Cirrus int/ext length ratio		–		–		–		–		–		–		–		–		–		–		–		–		–		–		–		–		–		–		–		–		–		–		–		–
Body appendages lengths
Cirrus B
Cirrus Bl
Cirrus Bd
Cirrus C
Cirrus Cl
Cirrus Cd
Cirrus D
Cirrus Dl
Cirrus Dd
Cirrus E
Cirrus El
Cirrus Ed
Spine on leg I length
Spine on leg II length
Spine on leg III length
Papilla on leg IV length
Number of teeth on the collar		–		–		–		–		–		–		–		–		–		–		–		–		–		–		–		–		–		–		–		–		–		–		–		–
Notch length
Claw 1 heights
Branch
Spur
Spur/branch height ratio		–		–		–		–		–		–		–		–		–		–		–		–		–		–		–		–		–		–		–		–		–		–		–		–
Claw 2 heights
Branch
Spur
Spur/branch height ratio		–		–		–		–		–		–		–		–		–		–		–		–		–		–		–		–		–		–		–		–		–		–		–		–
Claw 3 heights
Branch
Spur
Spur/branch height ratio		–		–		–		–		–		–		–		–		–		–		–		–		–		–		–		–		–		–		–		–		–		–		–		–
Claw 4 heights
Branch
Spur
Spur/branch height ratio		–		–		–		–		–		–		–		–		–		–		–		–		–		–		–		–		–		–		–		–		–		–		–		–
Third median plate (0 = absent; 1 = present)
[truncated: 19 more columns]

## Sheet: larvae
SPECIMEN	1 (HOL)		2		3		4		5		6		7		8		9		10		11		12		13		14		15		16		17		18		19		20		21		22		23		24		25
CHARACTER	µm	sc	µm	sc	µm	sc	µm	sc	µm	sc	µm	sc	µm	sc	µm	sc	µm	sc	µm	sc	µm	sc	µm	sc	µm	sc	µm	sc	µm	sc	µm	sc	µm	sc	µm	sc	µm	sc	µm	sc	µm	sc	µm	sc	µm	sc	µm	sc	µm
Body length
Scapular plate length		–		–		–		–		–		–		–		–		–		–		–		–		–		–		–		–		–		–		–		–		–		–		–		–
Head appendages lengths
Cirrus internus
Cephalic papilla
Cirrus externus
Clava
Cirrus A
Cirrus A/Body length ratio		–		–		–		–		–		–		–		–		–		–		–		–		–		–		–		–		–		–		–		–		–		–		–		–
Cirrus int/ext length ratio		–		–		–		–		–		–		–		–		–		–		–		–		–		–		–		–		–		–		–		–		–		–		–		–
Body appendages lengths
Cirrus B
Cirrus Bl
Cirrus Bd
Cirrus C
Cirrus Cl
Cirrus Cd
Cirrus D
Cirrus Dl
Cirrus Dd
Cirrus E
Cirrus El
Cirrus Ed
Spine on leg I length
Spine on leg II length
Spine on leg III length
Papilla on leg IV length
Number of teeth on the collar		–		–		–		–		–		–		–		–		–		–		–		–		–		–		–		–		–		–		–		–		–		–		–		–
Notch length
Claw 1 heights
Branch
Spur
Spur/branch height ratio		–		–		–		–		–		–		–		–		–		–		–		–		–		–		–		–		–		–		–		–		–		–		–		–
Claw 2 heights
Branch
Spur
Spur/branch height ratio		–		–		–		–		–		–		–		–		–		–		–		–		–		–		–		–		–		–		–		–		–		–		–		–
Claw 3 heights
Branch
Spur
Spur/branch height ratio		–		–		–		–		–		–		–		–		–		–		–		–		–		–		–		–		–		–		–		–		–		–		–		–
Claw 4 heights
Branch
Spur
Spur/branch height ratio		–		–		–		–		–		–		–		–		–		–		–		–		–		–		–		–		–		–		–		–		–		–		–		–
Third median plate (0 = absent; 1 = present)
[truncated: 19 more columns]

## Sheet: females_stats (μm)
Species	Population	Individual	Body length	Scapular plate length	Cirrus internus	Cephalic papilla	Cirrus externus	Clava	Cirrus A	Cirrus A/Body length ratio	Cirrus B	Cirrus C	Cirrus Cd	Cirrus D	Cirrus Dd	Cirrus E	Spine on leg I length	Papilla on leg IV length	Number of teeth on the collar	Claw 1 branch	Claw 1 spur	Claw 1 spur/branch height ratio	Claw 2 branch	Claw 2 spur	Claw 2 spur/branch height ratio	Claw 3 branch	Claw 3 spur	Claw 3 spur/branch height ratio	Claw 4 branch	Claw 4 spur	Claw 4 spur/branch height ratio
Echiniscus tropicalis	ID.032	1	188	38.3	11.9	6.1	14.2	4.3	23.7	0.126064	8.9	12.3	6.2	10.3	11.3	11	2.7	3	12	10.7	1.9	0.17757	10.6	2	0.188679	10.5			12.9
Echiniscus tropicalis	ID.032	2	178	35	10.1	6	11.6	4.5	23.9	0.13427	7.4	9.3	5.8	9.7	9.2	9.3	2.2	3.2	12	10	1.5	0.15	9.6	1.6	0.166667	9.4	1.8	0.191489	11.2	2.2	0.196429
Echiniscus tropicalis	ID.032	3	178	36.9	10.8	5.9	13.4	5.1	27.4	0.153933	6.4	9.8	6.7	5.7	9.5	11.9	2.7	3.2	12	9.6			9.9	2	0.20202	9.7	1.7	0.175258	11.1
Echiniscus tropicalis	ID.032	4	173	35		6.5	13.6	4.9	24.4	0.14104	5.7	10	6.1	7.5	9.3	9.7	2.4	3.8	11	9.6	1.5	0.15625	9.2	1.7	0.184783	8.7	1.8	0.206897	10.7	2.1	0.196262
Echiniscus tropicalis	ID.032	5	221	44.9	14.1	6.7	16.7	5.8	30.7	0.138914	10.3	14.7	6.7	10.2	11	13.5	3.6	4.3	14	12.4	2.6	0.209677	12	2	0.166667	12.3	2.3	0.186992	14.5
Echiniscus tropicalis	ID.032	6	223	43.5	13.4	6.6	14.4	6.1	29.4	0.131839	6.6	11.7	6.3	10.8	11.5	12.6	3.7	3.9	12	12.3	2.1	0.170732	11	2	0.181818	11.2	2	0.178571	13.3	2.5	0.18797
Echiniscus tropicalis	ID.032	7	209	41	13.2	7.7	14.9	5.9	32.5	0.155502	6.8	10.7	5.5	7.6	8.6	10.9	2.8	3.8	8	11.3	1.9	0.168142	10.3	1.6	0.15534	9.5	1.9	0.2	13	2.3	0.176923
Echiniscus tropicalis	ID.032	8	191	39.8	14.2	6	15	4.9			9	10	5.9	8.5	10.7	13	3.5	3.7	11	11.2	2.4	0.214286	11	1.9	0.172727	11.1	2	0.18018	13.9
Echiniscus tropicalis	ID.032	9	137	35.7	10.2	5	13		24.1	0.175912		9.8	6.5		8.5	11	1.9	3.2	10	10.3	2	0.194175	9.2	1.9	0.206522	9	1.6	0.177778	11.3	2.5	0.221239
Echiniscus tropicalis	ID.032	10	164	33.6	12.1	5.4	12.1	4.4	25.6	0.156098	8.3	9	7	8.7	9.4	12.6	2.5	3.2	15	10.2			9.6	1.6	0.166667	9.6	1.9	0.197917	11.2	2	0.178571
Echiniscus tropicalis	ID.032	11
Echiniscus tropicalis	ID.032	12
Echiniscus tropicalis	ID.032	13
Echiniscus tropicalis	ID.032	14
Echiniscus tropicalis	ID.032	15
Echiniscus tropicalis	ID.032	16
Echiniscus tropicalis	ID.032	17
Echiniscus tropicalis	ID.032	18
Echiniscus tropicalis	ID.032	19
Echiniscus tropicalis	ID.032	20
Echiniscus tropicalis	ID.032	21
Echiniscus tropicalis	ID.032	22
Echiniscus tropicalis	ID.032	23
Echiniscus tropicalis	ID.032	24
Echiniscus tropicalis	ID.032	25
Echiniscus tropicalis	ID.032	26
Echiniscus tropicalis	ID.032	27
Echiniscus tropicalis	ID.032	28
Echiniscus tropicalis	ID.032	29
Echiniscus tropicalis	ID.032	30

## Sheet: females_stats (sc)
Species	Population	Individual	Body length	Cirrus internus	Cephalic papilla	Cirrus externus	Clava	Cirrus A	Cirrus B	Cirrus C	Cirrus Cd	Cirrus D	Cirrus Dd	Cirrus E	Spine on leg I length	Papilla on leg IV length	Claw 1 branch	Claw 1 spur	Claw 2 branch	Claw 2 spur	Claw 3 branch	Claw 3 spur	Claw 4 branch	Claw 4 spur
Echiniscus tropicalis	ID.032	1	490.862	31.0705	15.9269	37.0757	11.2272	61.8799	23.2376	32.1149	16.188	26.893	29.5039	28.7206	7.04961	7.8329	27.9373	4.96084	27.6762	5.22193	27.4151		33.6815
Echiniscus tropicalis	ID.032	2	508.571	28.8571	17.1429	33.1429	12.8571	68.2857	21.1429	26.5714	16.5714	27.7143	26.2857	26.5714	6.28571	9.14286	28.5714	4.28571	27.4286	4.57143	26.8571	5.14286	32	6.28571
Echiniscus tropicalis	ID.032	3	482.385	29.2683	15.9892	36.3144	13.8211	74.2547	17.3442	26.5583	18.1572	15.4472	25.7453	32.2493	7.31707	8.67209	26.0163		26.8293	5.42005	26.2873	4.60705	30.0813
Echiniscus tropicalis	ID.032	4	494.286		18.5714	38.8571	14	69.7143	16.2857	28.5714	17.4286	21.4286	26.5714	27.7143	6.85714	10.8571	27.4286	4.28571	26.2857	4.85714	24.8571	5.14286	30.5714	6
Echiniscus tropicalis	ID.032	5	492.205	31.4031	14.922	37.1938	12.9176	68.3742	22.9399	32.7394	14.922	22.7171	24.4989	30.0668	8.01782	9.57684	27.6169	5.79065	26.7261	4.45434	27.3942	5.12249	32.294
Echiniscus tropicalis	ID.032	6	512.644	30.8046	15.1724	33.1034	14.023	67.5862	15.1724	26.8966	14.4828	24.8276	26.4368	28.9655	8.50575	8.96552	28.2759	4.82759	25.2874	4.5977	25.7471	4.5977	30.5747	5.74713
Echiniscus tropicalis	ID.032	7	509.756	32.1951	18.7805	36.3415	14.3902	79.2683	16.5854	26.0976	13.4146	18.5366	20.9756	26.5854	6.82927	9.26829	27.561	4.63415	25.122	3.90244	23.1707	4.63415	31.7073	5.60976
Echiniscus tropicalis	ID.032	8	479.899	35.6784	15.0754	37.6884	12.3116		22.6131	25.1256	14.8241	21.3568	26.8844	32.6633	8.79397	9.29648	28.1407	6.03015	27.6382	4.77387	27.8894	5.02513	34.9246
Echiniscus tropicalis	ID.032	9	383.754	28.5714	14.0056	36.4146		67.507		27.451	18.2073		23.8095	30.8123	5.32213	8.96359	28.8515	5.60224	25.7703	5.32213	25.2101	4.48179	31.6527	7.0028
Echiniscus tropicalis	ID.032	10	488.095	36.0119	16.0714	36.0119	13.0952	76.1905	24.7024	26.7857	20.8333	25.8929	27.9762	37.5	7.44048	9.52381	30.3571		28.5714	4.7619	28.5714	5.65476	33.3333	5.95238
Echiniscus tropicalis	ID.032	11
Echiniscus tropicalis	ID.032	12
Echiniscus tropicalis	ID.032	13
Echiniscus tropicalis	ID.032	14
Echiniscus tropicalis	ID.032	15
Echiniscus tropicalis	ID.032	16
Echiniscus tropicalis	ID.032	17
Echiniscus tropicalis	ID.032	18
Echiniscus tropicalis	ID.032	19
Echiniscus tropicalis	ID.032	20
Echiniscus tropicalis	ID.032	21
Echiniscus tropicalis	ID.032	22
Echiniscus tropicalis	ID.032	23
Echiniscus tropicalis	ID.032	24
Echiniscus tropicalis	ID.032	25
Echiniscus tropicalis	ID.032	26
Echiniscus tropicalis	ID.032	27
Echiniscus tropicalis	ID.032	28
Echiniscus tropicalis	ID.032	29
Echiniscus tropicalis	ID.032	30

## Sheet: males_stats (μm)
Species	Population	Individual	Body length	Scapular plate length	Cirrus internus	Cephalic papilla	Cirrus externus	Clava	Cirrus A	Cirrus A/Body length ratio	Cirrus int/ext length ratio	Cirrus B	Cirrus Bl	Cirrus Bd	Cirrus C	Cirrus Cl	Cirrus Cd	Cirrus D	Cirrus Dl	Cirrus Dd	Cirrus E	Cirrus El	Cirrus Ed	Spine on leg I length	Spine on leg II length	Spine on leg III length	Papilla on leg IV length	Number of teeth on the collar	Notch length	Claw 1 branch	Claw 1 spur	Claw 1 spur/branch height ratio	Claw 2 branch	Claw 2 spur	Claw 2 spur/branch height ratio	Claw 3 branch	Claw 3 spur	Claw 3 spur/branch height ratio	Claw 4 branch	Claw 4 spur	Claw 4 spur/branch height ratio
Echiniscus tropicalis	ID.032	1 (HOL)
Echiniscus tropicalis	ID.032	2
Echiniscus tropicalis	ID.032	3
Echiniscus tropicalis	ID.032	4
Echiniscus tropicalis	ID.032	5
Echiniscus tropicalis	ID.032	6
Echiniscus tropicalis	ID.032	7
Echiniscus tropicalis	ID.032	8
Echiniscus tropicalis	ID.032	9
Echiniscus tropicalis	ID.032	10
Echiniscus tropicalis	ID.032	11
Echiniscus tropicalis	ID.032	12
Echiniscus tropicalis	ID.032	13
Echiniscus tropicalis	ID.032	14
Echiniscus tropicalis	ID.032	15
Echiniscus tropicalis	ID.032	16
Echiniscus tropicalis	ID.032	17
Echiniscus tropicalis	ID.032	18
Echiniscus tropicalis	ID.032	19
Echiniscus tropicalis	ID.032	20
Echiniscus tropicalis	ID.032	21
Echiniscus tropicalis	ID.032	22
Echiniscus tropicalis	ID.032	23
Echiniscus tropicalis	ID.032	24
Echiniscus tropicalis	ID.032	25
Echiniscus tropicalis	ID.032	26
Echiniscus tropicalis	ID.032	27
Echiniscus tropicalis	ID.032	28
Echiniscus tropicalis	ID.032	29
Echiniscus tropicalis	ID.032	30

## Sheet: males_stats (sc)
Species	Population	Individual	Body length	Cirrus internus	Cephalic papilla	Cirrus externus	Clava	Cirrus A	Cirrus B	Cirrus Bl	Cirrus Bd	Cirrus C	Cirrus Cl	Cirrus Cd	Cirrus D	Cirrus Dl	Cirrus Dd	Cirrus E	Cirrus El	Cirrus Ed	Spine on leg I length	Spine on leg II length	Spine on leg III length	Papilla on leg IV length	Notch length	Claw 1 branch	Claw 1 spur	Claw 2 branch	Claw 2 spur	Claw 3 branch	Claw 3 spur	Claw 4 branch	Claw 4 spur
Echiniscus tropicalis	ID.032	1 (HOL)
Echiniscus tropicalis	ID.032	2
Echiniscus tropicalis	ID.032	3
Echiniscus tropicalis	ID.032	4
Echiniscus tropicalis	ID.032	5
Echiniscus tropicalis	ID.032	6
Echiniscus tropicalis	ID.032	7
Echiniscus tropicalis	ID.032	8
Echiniscus tropicalis	ID.032	9
Echiniscus tropicalis	ID.032	10
Echiniscus tropicalis	ID.032	11
Echiniscus tropicalis	ID.032	12
Echiniscus tropicalis	ID.032	13
Echiniscus tropicalis	ID.032	14
Echiniscus tropicalis	ID.032	15
Echiniscus tropicalis	ID.032	16
Echiniscus tropicalis	ID.032	17
Echiniscus tropicalis	ID.032	18
Echiniscus tropicalis	ID.032	19
Echiniscus tropicalis	ID.032	20
Echiniscus tropicalis	ID.032	21
Echiniscus tropicalis	ID.032	22
Echiniscus tropicalis	ID.032	23
Echiniscus tropicalis	ID.032	24
Echiniscus tropicalis	ID.032	25
Echiniscus tropicalis	ID.032	26
Echiniscus tropicalis	ID.032	27
Echiniscus tropicalis	ID.032	28
Echiniscus tropicalis	ID.032	29
Echiniscus tropicalis	ID.032	30

[truncated: 4 more sheets: juveniles_stats (μm), juvenles_stats (sc), larvae_stats (μm), larvae_stats (sc)]
